# Supplementary material for: NAMPT-derived NAD+ fuels PARP1 to promote skin inflammation through parthanatos cell death
Source: PubMed Central journal article supplement (PMC8601609; doi:10.1371/journal.pbio.3001455), 2021-11-08
Supplement: pbio.3001455.s003.pdf [file pbio.3001455.s003.pdf]

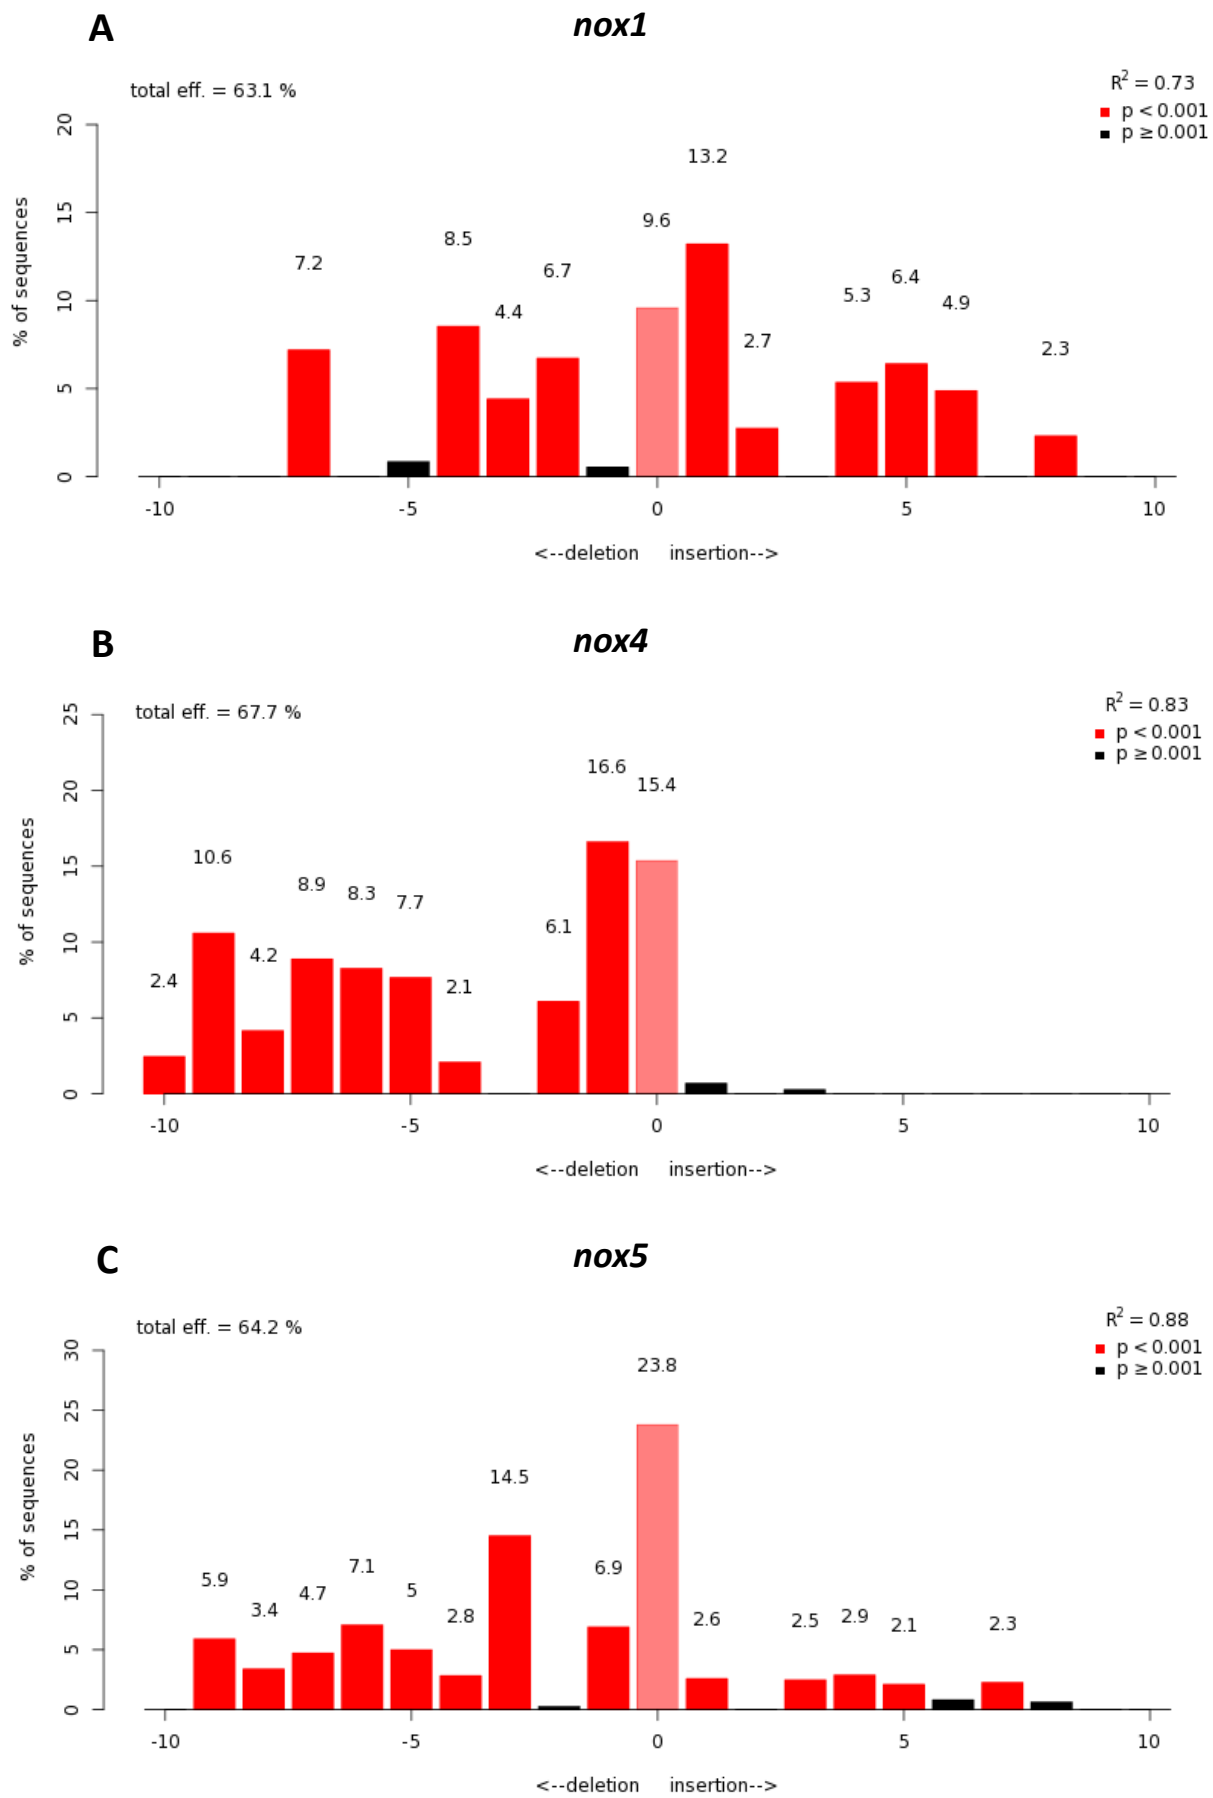

**S3 Figure, related to Figure 3. Efficiency of crRNA for *nox1*, *nox4* and *nox5*.** Analysis of genome editing efficiency in larvae injected with control or *nox1* (A), *nox4* (B) and *nox5* (C) crRNA/Cas9 complexes and quantification rate of non-homologous end-joining mediated repair (NHEJ) showing all insertions and deletions (INDELs) (<https://tide.nki.nl/>).
