# Supplementary material for: NAMPT-derived NAD+ fuels PARP1 to promote skin inflammation through parthanatos cell death
Source: PubMed Central journal article supplement (PMC8601609; doi:10.1371/journal.pbio.3001455), 2021-11-08
Supplement: pbio.3001455.s005.pdf [file pbio.3001455.s005.pdf]

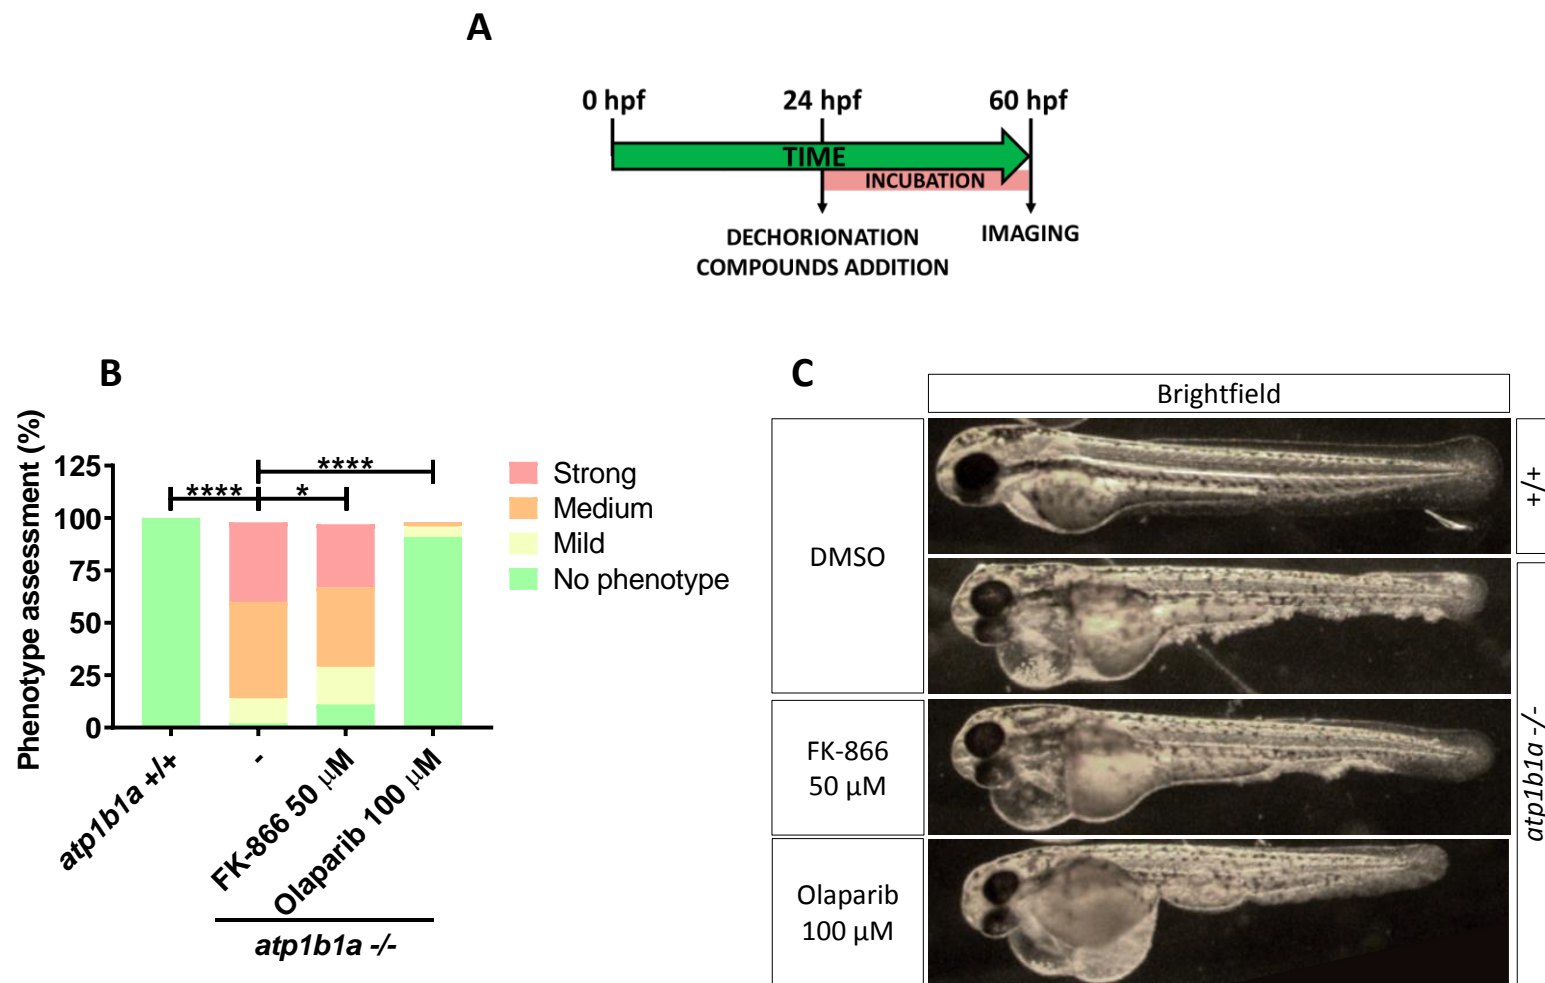

**S5 Figure, related to Figures 2 and 4. FK-866 and olaparib improve skin epithelial integrity in psoriasis mutants.** (A, B) Determination of the skin phenotype of 2.5 dpf zebrafish *Atp1b1a*-deficient larvae treated 1.5 days with 50  $\mu$ M FK-866 or 100  $\mu$ M olaparib. (C) Representative bright field images of zebrafish larvae of every group are shown. P values were calculated using Chi-square and Fisher's exact test \* $p \leq 0.05$ , \*\*\*\* $p \leq 0.0001$ . The data underlying this figure can be found in S1 Data.
