# Supplementary material for: NAMPT-derived NAD+ fuels PARP1 to promote skin inflammation through parthanatos cell death
Source: PubMed Central journal article supplement (PMC8601609; doi:10.1371/journal.pbio.3001455), 2021-11-08
Supplement: pbio.3001455.s007.pdf [file pbio.3001455.s007.pdf]

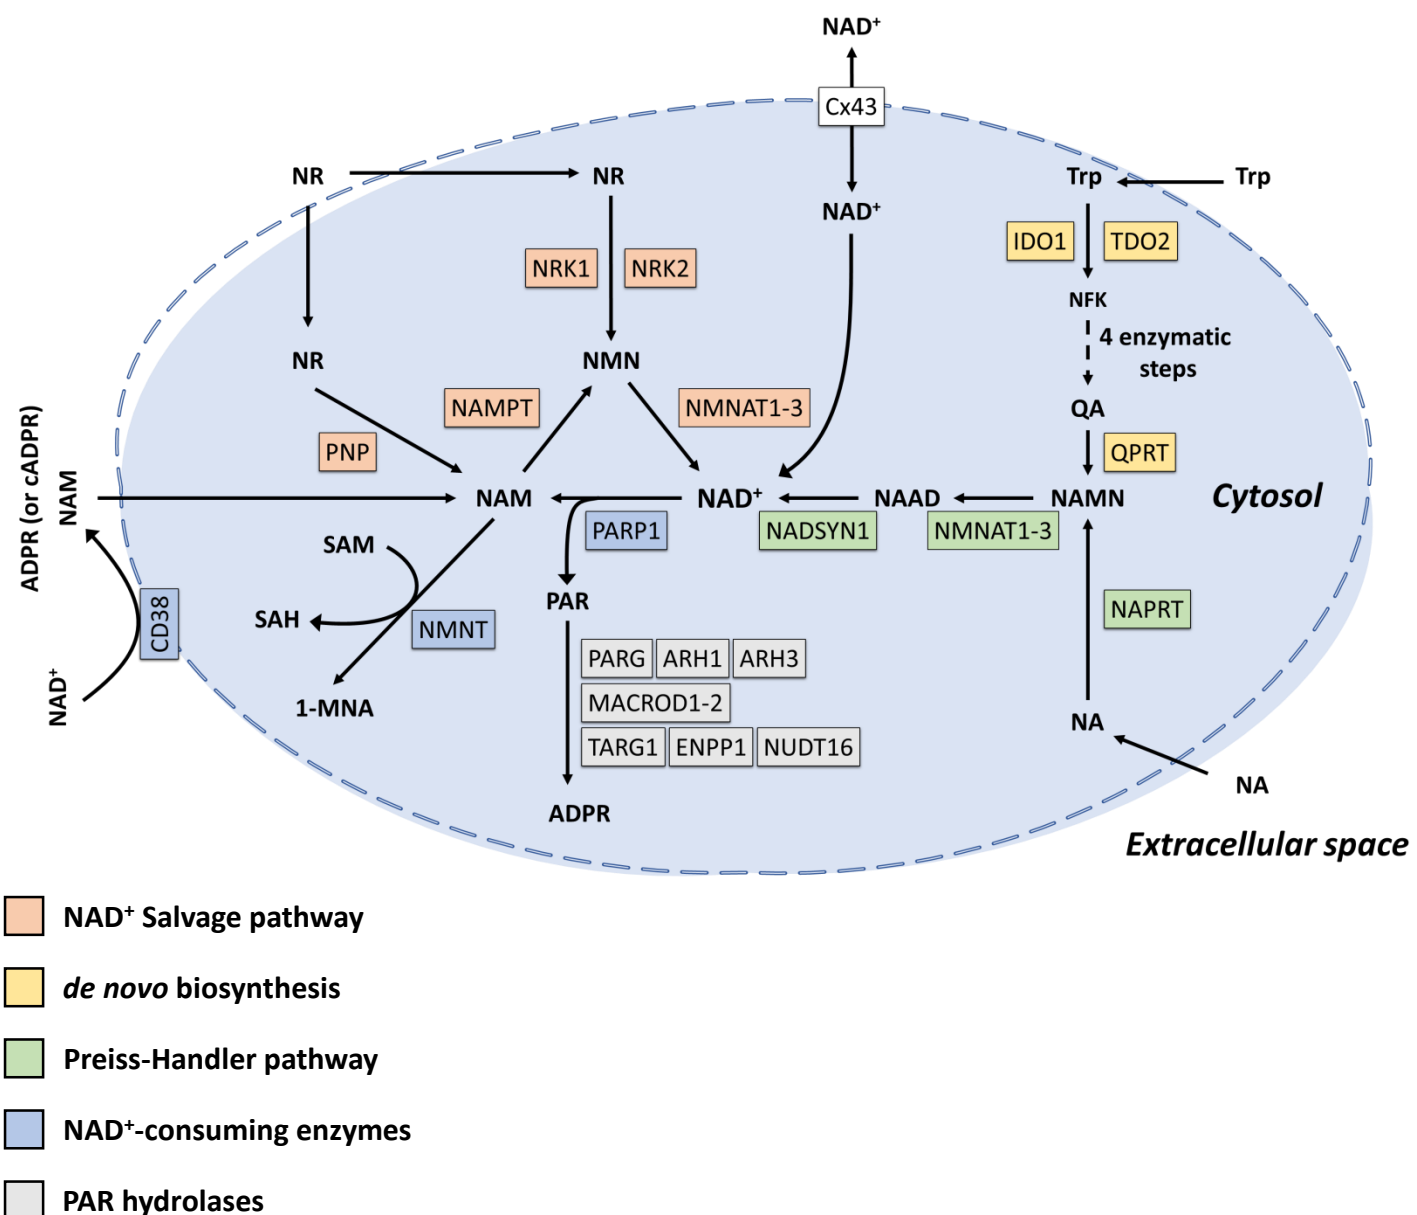

**S7 Figure, related to Figure 6. NAD<sup>+</sup> and PAR metabolic pathways.** NAM, NMN and NAD<sup>+</sup> can be taken up by specific transporters. NAD<sup>+</sup> biosynthetic pathways generate NAD<sup>+</sup> from different precursors, *de novo* pathway employs dietary tryptophan (Trp) or alternatively quinolinic acid (QA), NAD<sup>+</sup> Salvage pathway mainly uses nicotinamide (NAM) but nicotinamide mononucleotide (NMN) and nicotinamide riboside (NR) can also act as precursors. However, Preiss-Handler pathway utilizes nicotinic acid (NA). NAD<sup>+</sup> is consumed by CD38 yielding NAM and adenosine diphosphoribose (ADPR) or cyclic ADPR (cADPR). NMNT also reduces NAD<sup>+</sup> pool mediating the reaction between NAM and S-adenosylmethionine (SAM) to produce N-methylnicotinamide (1-MNA) and S-adenosylhomocysteine (SAH). Finally, PARP1 synthesizes PAR by using NAD<sup>+</sup> as a cofactor. PAR is degraded to ADPR mediated by different PAR hydrolases which cleave specific chemical linkages (exo- or endoglycosidically). Metabolic intermediates: N-formylkynurenine (NFK), nicotinic acid adenine dinucleotide (NAAD) and nicotinic acid mononucleotide (NAMN). NAD<sup>+</sup> transporter: connexin 43 (CX43).
