# Supplementary material for: NAMPT-derived NAD+ fuels PARP1 to promote skin inflammation through parthanatos cell death
Source: PubMed Central journal article supplement (PMC8601609; doi:10.1371/journal.pbio.3001455), 2021-11-08
Supplement: pbio.3001455.s008.pdf [file pbio.3001455.s008.pdf]

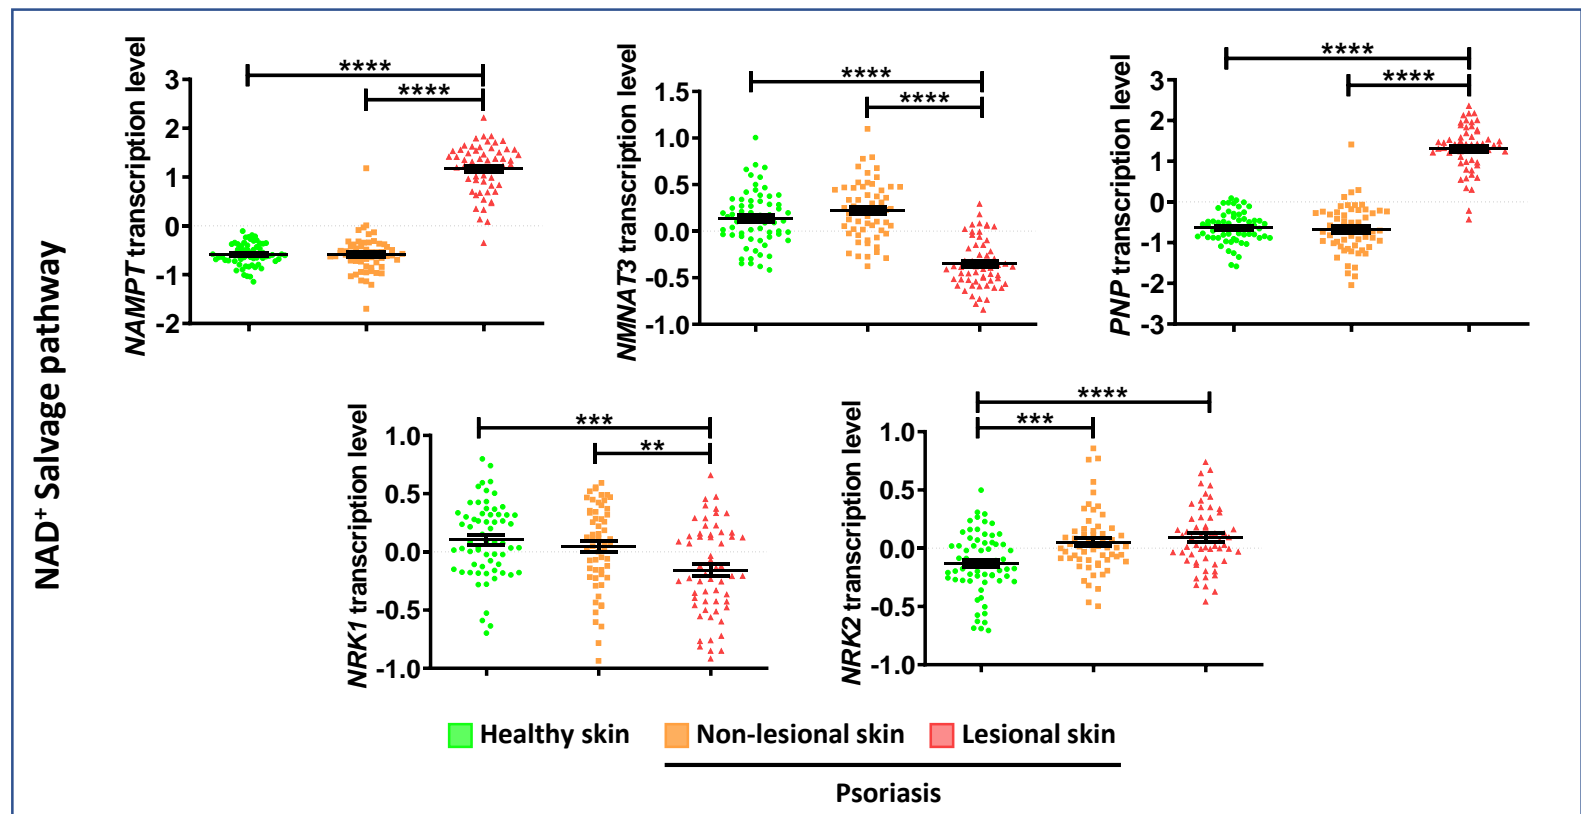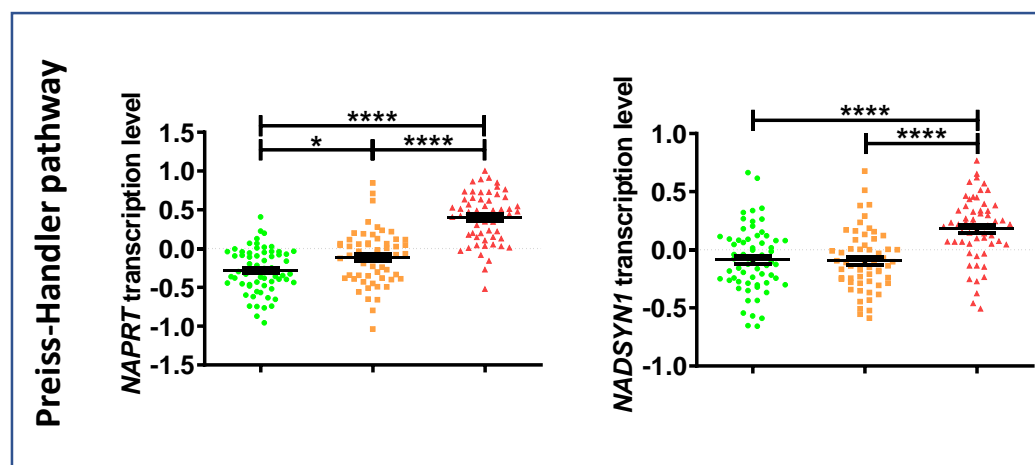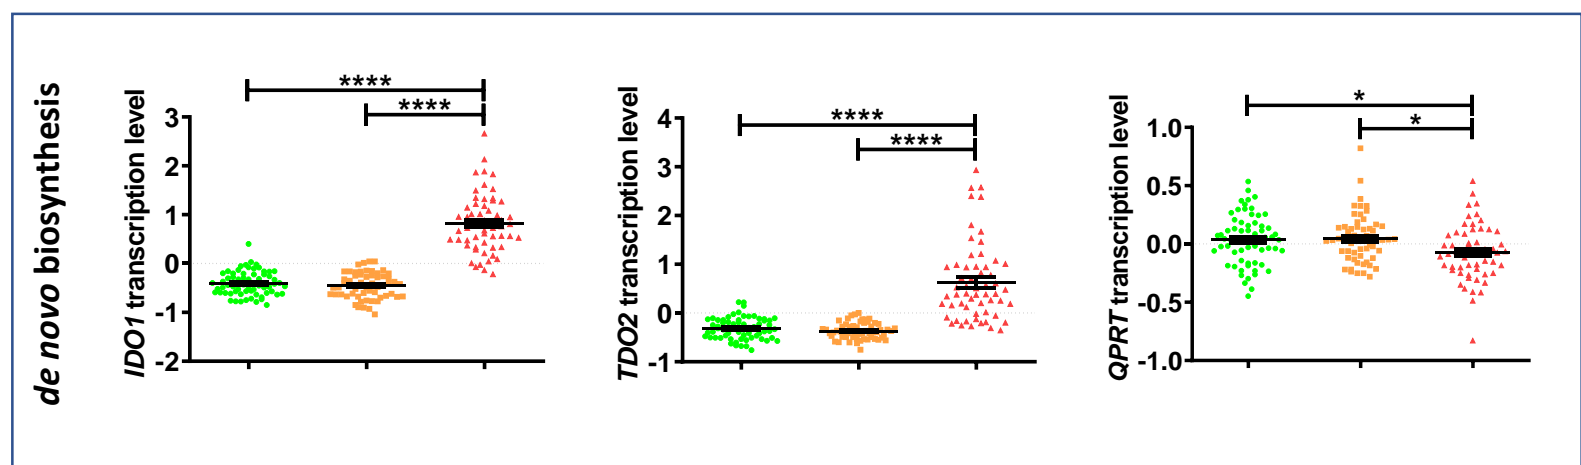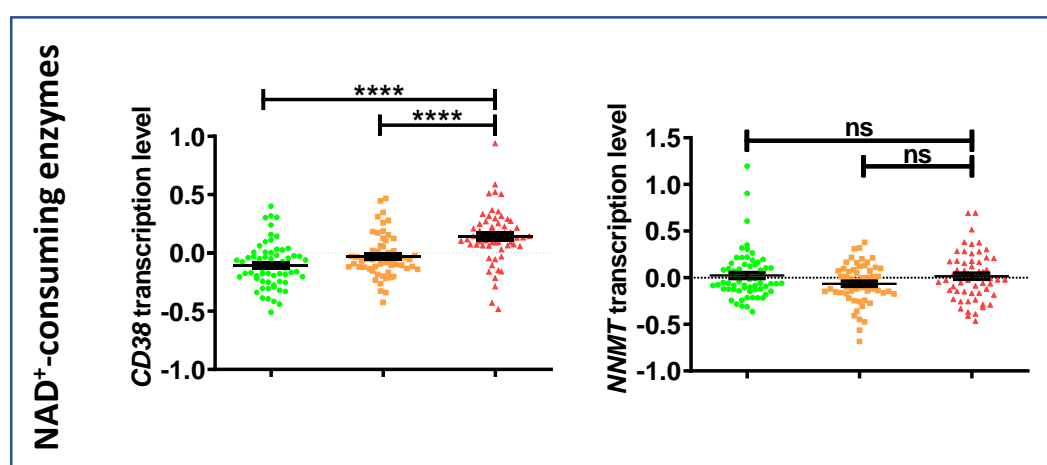

**S8 Figure, related to Figure 6. Differential expression profiles of genes encoding key NAD<sup>+</sup> metabolic enzymes in psoriasis and atopic dermatitis.** Transcriptomic data from human psoriasis (GDS4602) samples from the Gene Expression Omnibus (GEO) database. Non-lesional and lesional psoriasis skin were compared with healthy skin samples. Each dot represents one individual and the mean  $\pm$  S.E.M. for each group is also shown. P values were calculated using one-way ANOVA and Tukey multiple range test (A) and t-Test (B). ns, not significant. \* $p \leq 0.05$ , \*\* $p \leq 0.01$ , \*\*\* $p \leq 0.001$ , \*\*\*\* $p \leq 0.0001$ . The data underlying this figure can be found in S1 Data.
